# Supplementary figures and images for: Premature polyadenylation of MAGI3 produces a dominantly-acting oncogene in human breast cancer
Source: eLife journal article supplement (doi:10.7554/elife.14730), 2016-05-20

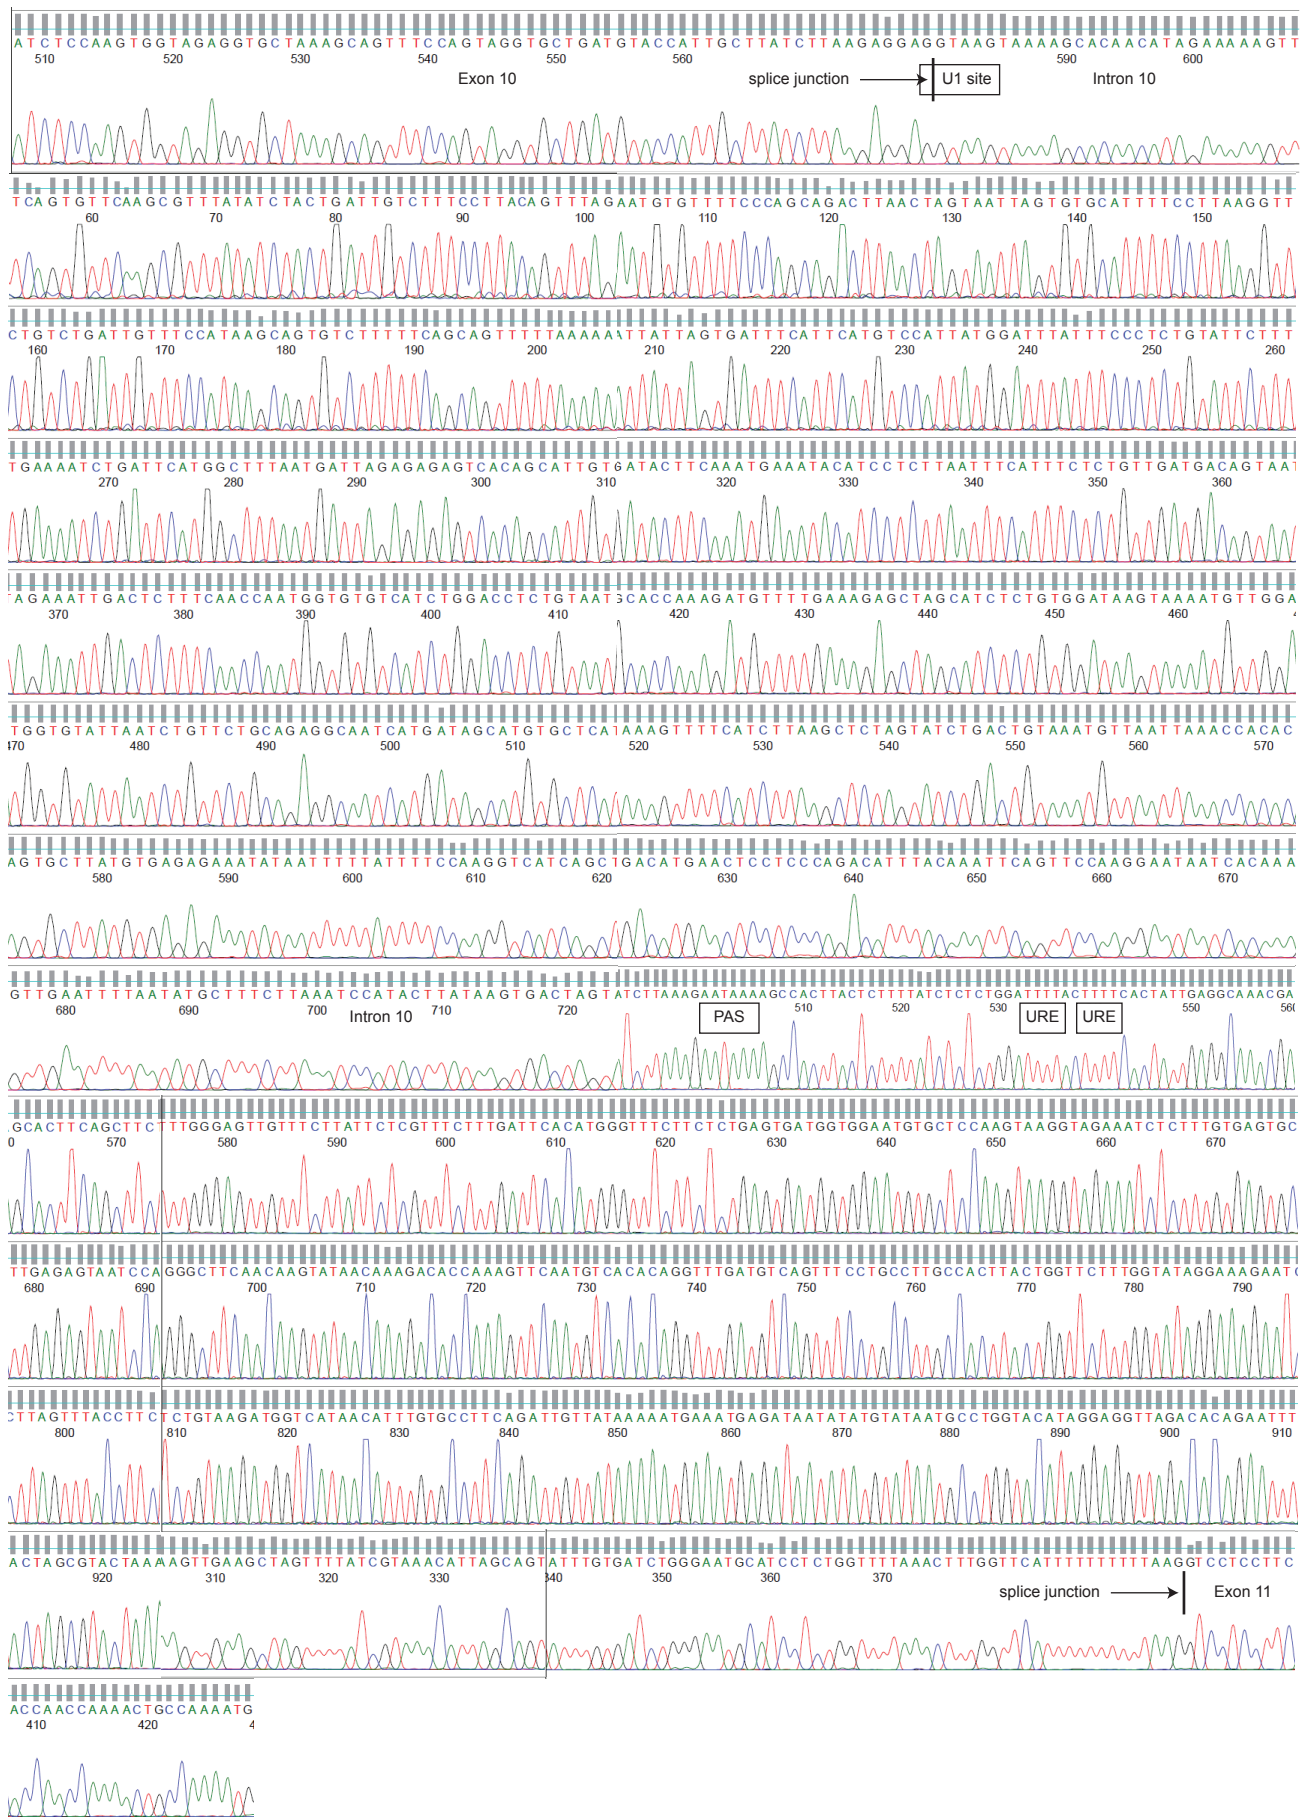

Supplement: supp [file elife_poa_e14730_Figure_1_figure_supplement_1.pdf › elife_poa_e14730_Figure_1_figure_supplement_1.pdf]

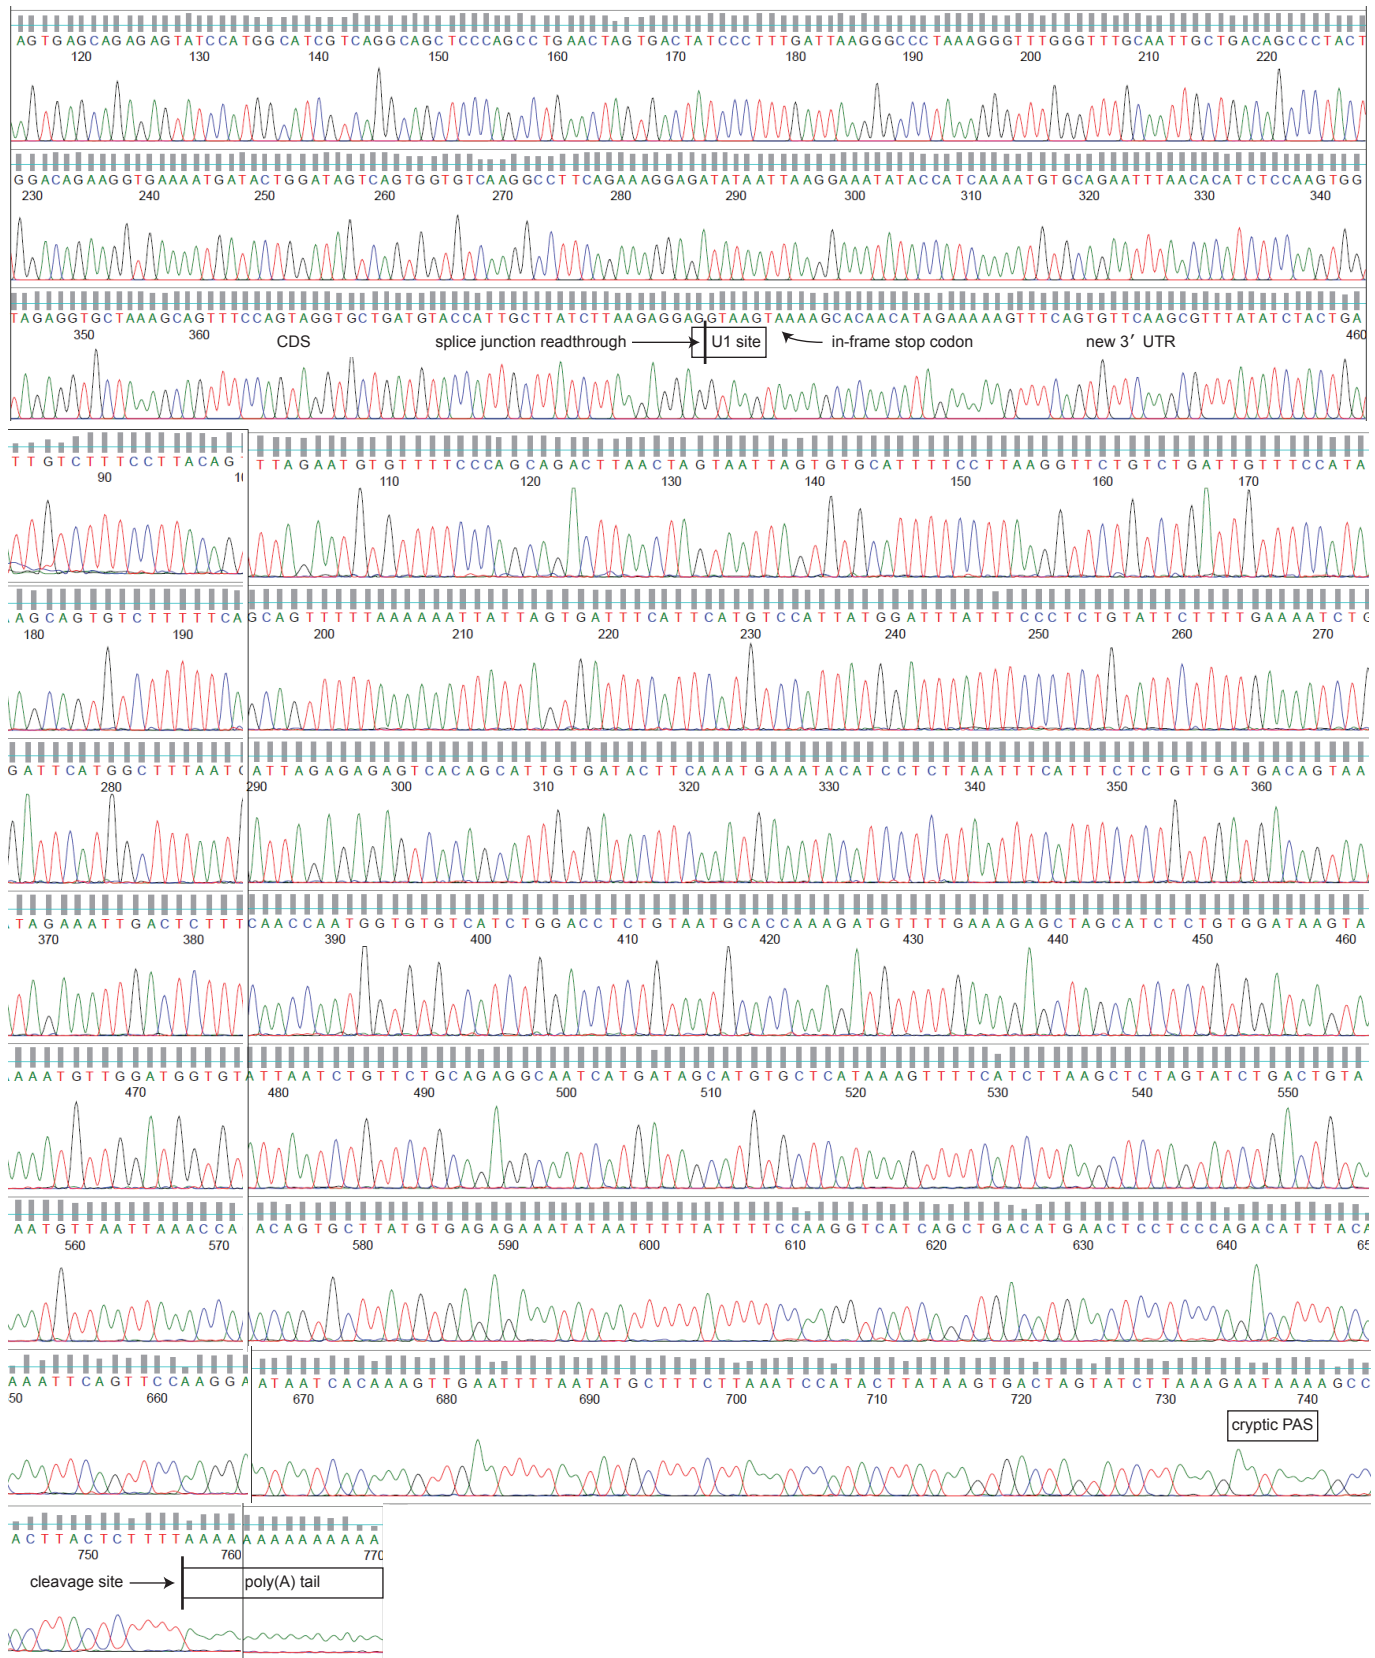

Supplement: supp [file elife_poa_e14730_Figure_1_figure_supplement_2.pdf › elife_poa_e14730_Figure_1_figure_supplement_2.pdf]

Figure 4--supplement 1

Ni et al.

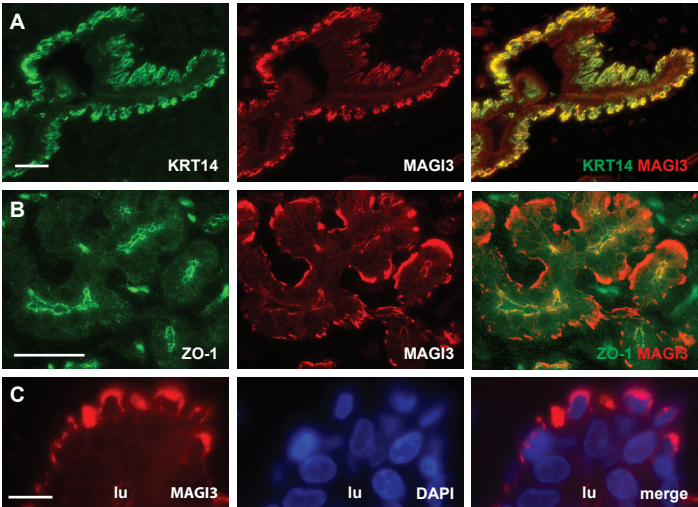

Supplement: supp [file elife_poa_e14730_Figure_4_figure_supplement_1.pdf › elife_poa_e14730_Figure_4_figure_supplement_1.pdf]
